# Supplementary material
Source: publisher figshare collection journal article supplement (https://acs.figshare.com/ndownloader/files/13867775)
Supplement: Supplementary file 1 [file 13867775]

## Supporting Information

Transparent Grafted Zwitterionic Copolymer Coatings That Exhibit Both Antifogging  
and Self-cleaning Properties

*Qiaohong Liu<sup>†, §</sup>, Jason Locklin<sup>†, §, \*</sup>*

<sup>†</sup>Department of Chemistry, University of Georgia, 140 Cedar  
Street, Athens, Georgia, 30602, United States

<sup>§</sup>New Materials Institute, University of Georgia, Athens, 220  
Riverbend Road, Georgia, 30605, United States

### Corresponding Author

\*E-mail: jlocklin@uga.edu

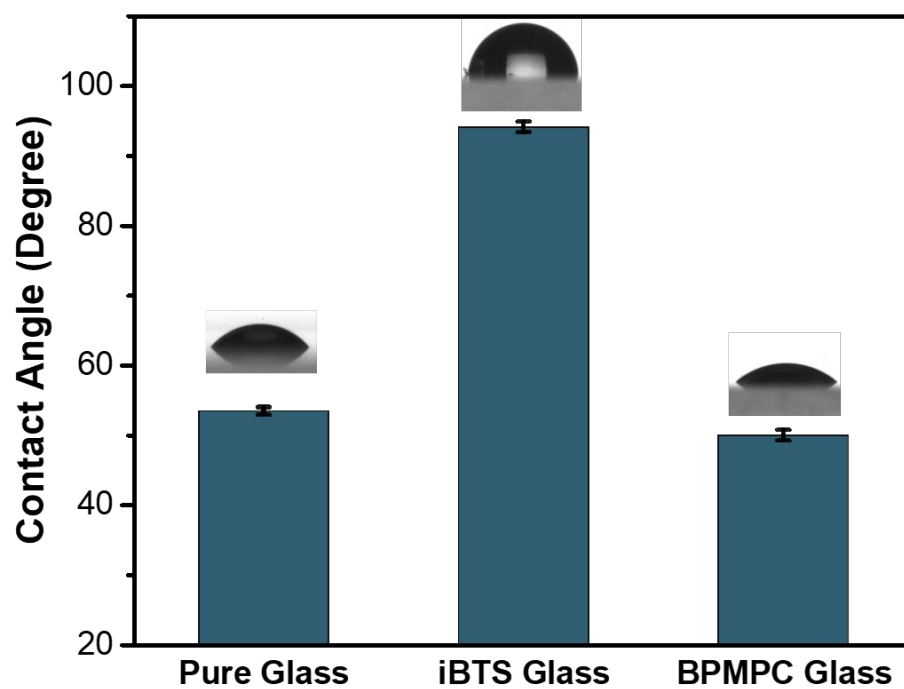

**Figure S1.** Contact angle of pure glass, iBTS modified glass and BPMPC coated glass, and digital images of water droplet respectively (top).

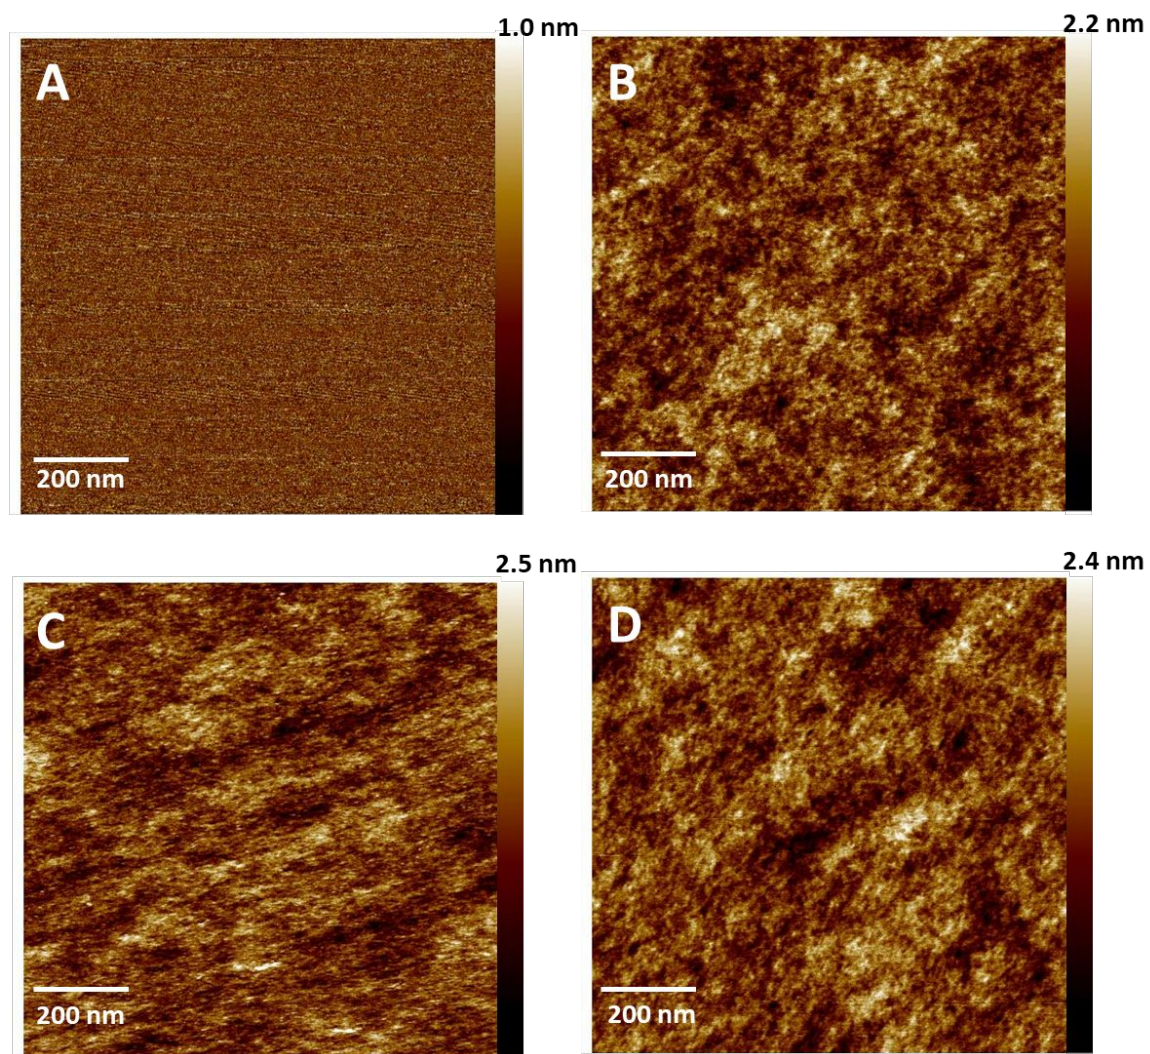

**Figure S2.** AFM topography images of (A) bare glass, (B) 60 nm, (C) 250 nm and (D) 300 nm BPMPC coatings.

Movie S1 BPMPC glass slide hot-vapor test  
Movie S2 oil droplet cleaning  
Movie S3 BPMPC fingerprint removal  
Movie S4 BPMPC glass slide Windex cleaning test  
Movie S5 Eyeglasses Expo cleaning test
